# Supplementary figures and images for: CD8+PD-1+ to CD4+PD-1+ ratio (PERLS) is associated with prognosis of patients with advanced NSCLC treated with PD-(L)1 blockers
Source: HighWire-hosted journal article supplement (doi:10.1136/jitc-2021-004012), 2022-02-01

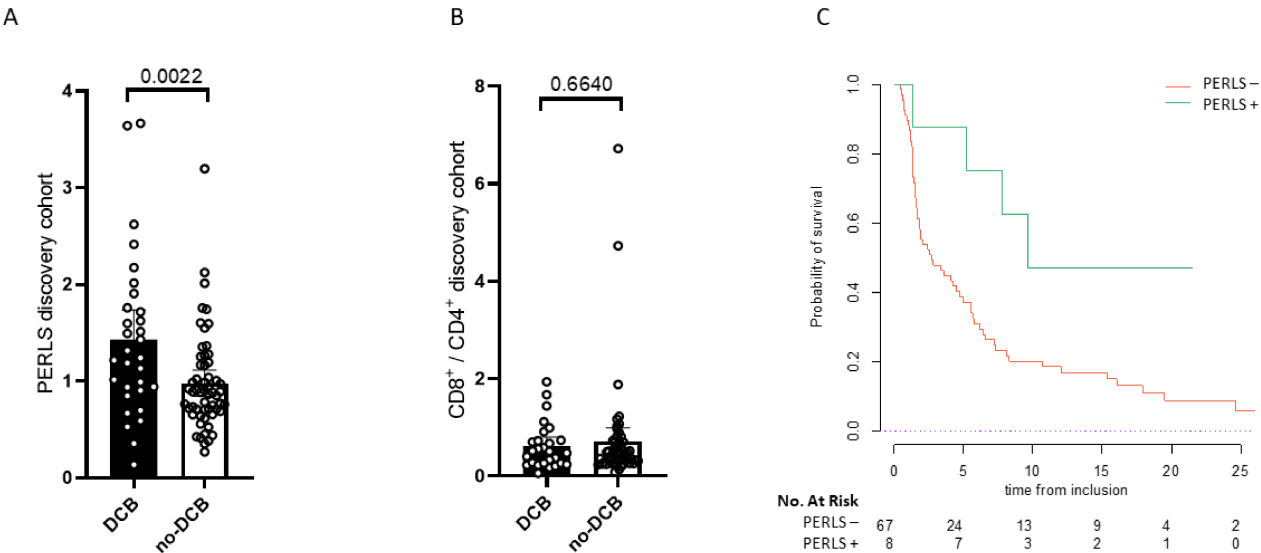

Supplement: jitc-2021-004012supp002_data_supplement.pdf [file jitc-2021-004012supp002_data_supplement.pdf]

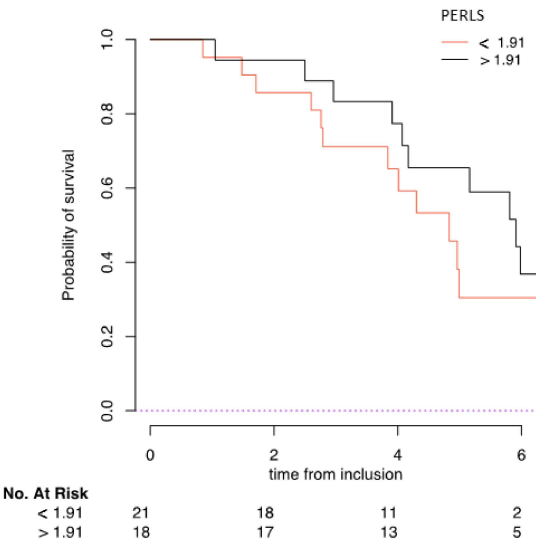

Supplement: jitc-2021-004012supp003_data_supplement.pdf [file jitc-2021-004012supp003_data_supplement.pdf]

A

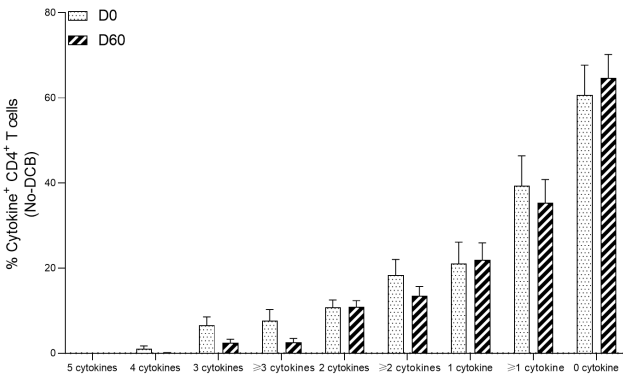

B

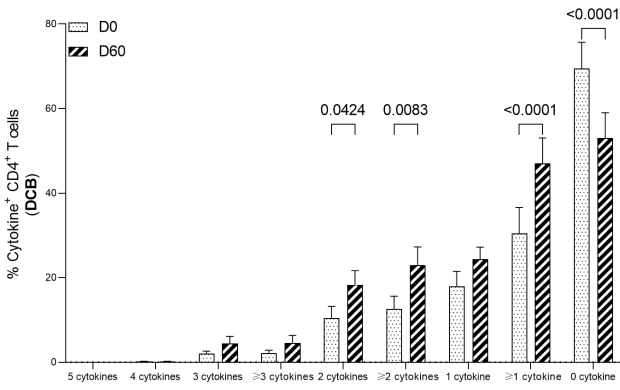

C

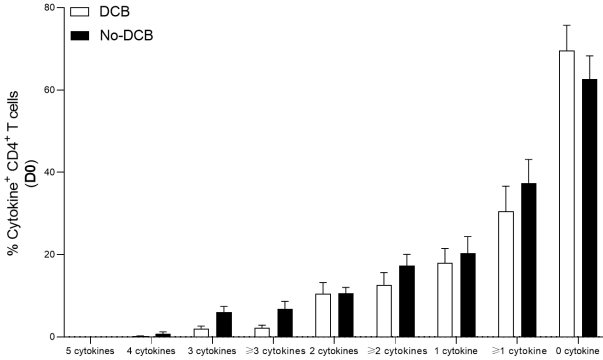

D

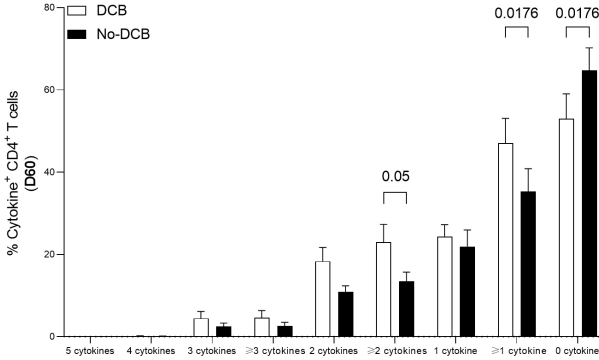

Supplement: jitc-2021-004012supp004_data_supplement.pdf [file jitc-2021-004012supp004_data_supplement.pdf]
